# Supplementary material for: Biomass-based ionic liquids efficiently catalyzed the cycloaddition reaction of epoxides with CO2 by hydrogen-bonding and the anion cooperative effect
Source: Royal Society of Chemistry journal article supplement (doi:10.1039/d4su00033a), 2024-01-01
Supplement: d4su00033a1.pdf [file d4su00033a1.pdf]

## Supporting Information

### **Biomass-based ionic liquids efficiently catalyzed the cycloaddition reaction of epoxides with CO<sub>2</sub> by hydrogen- bonding and anion cooperative effect**

Kaixin Guo,<sup>†a</sup> Na Ji,<sup>†a</sup> Feng Han,<sup>a\*</sup> Qingfeng Yang,<sup>b</sup> Ning Wang<sup>a</sup> and Chengxia Miao<sup>a\*</sup>

<sup>a</sup> *Key Laboratory of Low-Carbon and Green Agriculture Chemistry in Universities of  
Shandong, College of Chemistry and Material Science, Shandong Agricultural  
University, Daizong Road No. 61, Tai'an, Shandong, 271018, China*

<sup>b</sup> *State Key Laboratory of High-Efficiency Utilization of Coal and Green Chemical  
Engineering, Ningxia University, Yinchuan, Ningxia, 750021, China*

<sup>†</sup> *These authors contributed equally.*

*\* Corresponding author E-mail addresses: fenghan@sdau.edu.cn (F. Han),  
chxmiao@sdau.edu.cn (C. Miao).*

**Keywords:** *Biomass-based ionic liquids; Carbon dioxide; Cycloaddition; Hydrogen  
bonding; Single-component*

---

## Contents

|                                                                                                               |     |
|---------------------------------------------------------------------------------------------------------------|-----|
| Procedures for synthesizing biomass-based ionic liquids.....                                                  | S3  |
| NMR data of [2-FD-NMeEt <sub>2</sub> ]I and the products.....                                                 | S5  |
| NMR spectra of biomass-based ionic liquids and products .....                                                 | S7  |
| IR spectra to test the hydrogen bonding effect and confirm the configuration of <b>2f</b> and <b>2g</b> ..... | S22 |

## 1. Procedures for synthesizing biomass-based ionic liquids

### 1.1. [5-HMFD-NEt<sub>3</sub>]Br

The first step is the same as shown in step 1 of Scheme 2 in the main text. Next, 5 mmol tertiary amine dissolved in 20 mL acetone was added 5.5 mmol ethyl iodide (CH<sub>3</sub>CH<sub>2</sub>I), and the mixture was stirred at 60 °C for 12 h. After the reaction, acetone was used to wash the crude product many times to get [5-HMFD-NEt<sub>3</sub>]Br as white solid in a 90% yield.

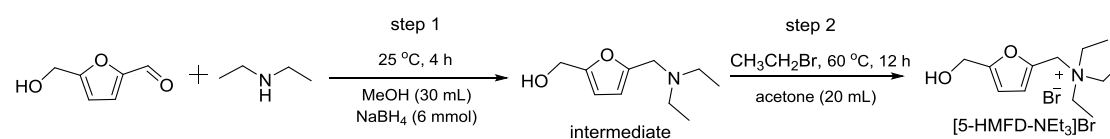

**Scheme S1** Preparation of [5-HMFD-NEt<sub>3</sub>]Br.

### 1.2. [5-HMFD-NBuEt<sub>2</sub>]Br

The first step is the same as shown in step 1 of Scheme 2 in the main text. Next, 5 mmol tertiary amine dissolved in 20 mL CH<sub>3</sub>CN was added 5.5 mmol bromobutane (C<sub>4</sub>H<sub>9</sub>Br), and the mixture was stirred at 80 °C for 12 h. After the reaction, ethyl ether was used to wash the crude product many times to get [5-HMFD-NBuEt<sub>2</sub>]Br as yellow oil in a 76% yield.

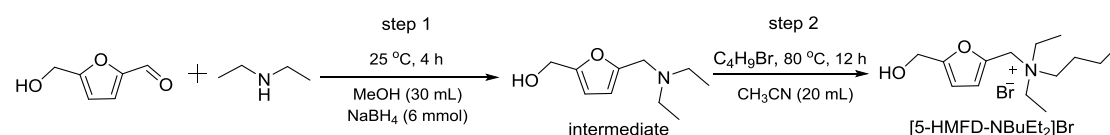

**Scheme S2** Preparation of [5-HMFD-NBuEt<sub>2</sub>]Br.

### 1.3. [5-HMFD-NHeEt<sub>2</sub>]Br

The first step is the same as shown in step 1 of Scheme 2 in the main text. Next, 5 mmol tertiary amine dissolved in 20 mL CH<sub>3</sub>CN was added 5.5 mmol 1-bromooctane (C<sub>8</sub>H<sub>17</sub>Br), and the mixture was stirred at 80 °C for 12 h. After the reaction, ethyl ether was used to wash the crude product many times to get [5-HMFD-NHeEt<sub>2</sub>]Br as yellow oil in a 70% yield.

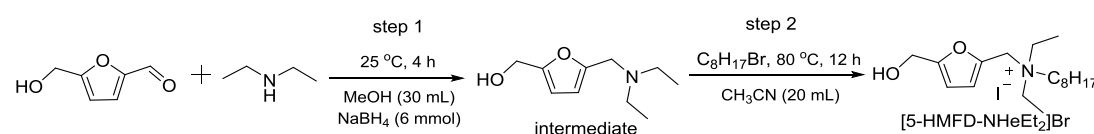

**Scheme S3** Preparation of [5-HMFD-NHeEt<sub>2</sub>]Br.

#### 1.4. [5-HMFD-NDoEt<sub>2</sub>]Br

The first step is the same as shown in step 1 of Scheme 2 in the main text. Next, 5 mmol tertiary amine dissolved in 20 mL CH<sub>3</sub>CN was added 5.5 mmol 1-bromododecane (C<sub>12</sub>H<sub>25</sub>Br), and the mixture was stirred at 80 °C for 12 h. After the reaction, EtOAc was used to wash the crude product many times to get [5-HMFD-NDoEt<sub>2</sub>]Br as white solid in a 67% yield.

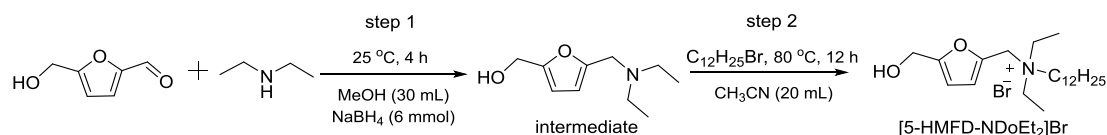

**Scheme S4** Preparation of [5-HMFD-NDoEt<sub>2</sub>]Br.

#### 1.5. [5-HMFD-NCeEt<sub>2</sub>]Br

The first step is the same as shown in step 1 of Scheme 2 in the main text. Next, 5 mmol tertiary amine dissolved in 20 mL CH<sub>3</sub>CN was added 5.5 mmol 1-bromohexadecane (C<sub>16</sub>H<sub>33</sub>Br), and the mixture was stirred at 80 °C for 12 h. After the reaction, EtOAc was used to wash the crude product many times to get [5-HMFD-NCeEt<sub>2</sub>]Br as white solid in a 61% yield.

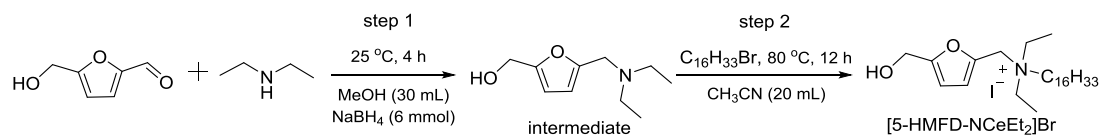

**Scheme S5** Preparation of [5-HMFD-NCeEt<sub>2</sub>]Br.

#### 1.6. [5-HMFD-NDoEt<sub>2</sub>]I

The first step is the same as shown in step 1 of Scheme 2 in the main text. Next, 5 mmol tertiary amine dissolved in 20 mL CH<sub>3</sub>CN was added 5.5 mmol 1-iodododecane (C<sub>12</sub>H<sub>25</sub>I), and the mixture was stirred at 80 °C for 12 h. After the reaction, EtOAc was used to wash the crude product many times to get [5-HMFD-NDoEt<sub>2</sub>]I as white solid in a 71% yield.

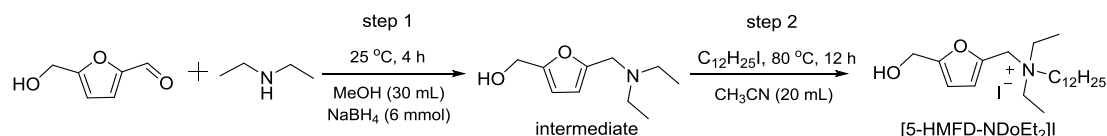

**Scheme S6** Preparation of [5-HMFD-NDoEt<sub>2</sub>]I.

## 2. NMR data of [2-FD-NMeEt<sub>2</sub>]I and the products

### 2.1. [2-FD-NMeEt<sub>2</sub>]I

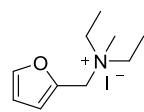 <sup>1</sup>H NMR (400 MHz, D<sub>2</sub>O) δ 7.65 (dd, *J* = 2.0, 0.8 Hz, 1H), 6.80 (d, *J* = 3.4 Hz, 1H), 6.55 (dd, *J* = 3.4, 1.9 Hz, 1H), 4.50 (s, 2H), 3.30 (tt, *J* = 7.2, 3.7 Hz, 4H), 2.94 (s, 3H), 1.36 (t, *J* = 7.3 Hz, 6H). <sup>13</sup>C NMR (101 MHz, D<sub>2</sub>O) δ 145.7, 142.0, 116.5, 111.2, 56.4, 56.1, 46.6, 7.2.

### 2.2. 4-phenyl-1,3-dioxolan-2-one (**2a**)

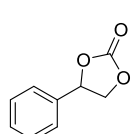 <sup>1</sup>H NMR (400 MHz, CDCl<sub>3</sub>) δ 7.46 – 7.39 (m, 3H), 7.35 (dd, *J* = 7.4, 2.3 Hz, 2H), 5.67 (t, *J* = 8.0 Hz, 1H), 4.79 (t, *J* = 8.4 Hz, 1H), 4.32 (t, *J* = 8.2 Hz, 1H). <sup>13</sup>C NMR (101 MHz, CDCl<sub>3</sub>) δ 155.0, 135.9, 129.8, 129.3, 126.0, 78.1, 71.3.

### 2.3. 4-methyl-1,3-dioxolan-2-one (**2b**)

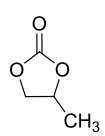 <sup>1</sup>H NMR (400 MHz, CDCl<sub>3</sub>) δ 4.90 (d, *J* = 6.6 Hz, 1H), 4.59 (t, *J* = 8.1 Hz, 1H), 4.06 (dd, *J* = 8.5, 7.2 Hz, 1H), 1.50 (d, *J* = 6.4 Hz, 3H). <sup>13</sup>C NMR (101 MHz, CDCl<sub>3</sub>) δ 155.2, 73.8, 70.7, 19.3.

### 2.4. 4-methyl-1,3-dioxolan-2-one (**2c**)

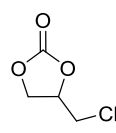 <sup>1</sup>H NMR (400 MHz, CDCl<sub>3</sub>) δ 5.03 (dtd, *J* = 8.6, 5.3, 3.6 Hz, 1H), 4.62 (t, *J* = 8.6 Hz, 1H), 4.43 (dd, *J* = 8.9, 5.7 Hz, 1H), 3.84 (dd, *J* = 12.3, 4.9 Hz, 1H), 3.75 (dd, *J* = 12.3, 3.6 Hz, 1H). <sup>13</sup>C NMR (101 MHz, CDCl<sub>3</sub>) δ 154.5, 74.5, 67.0, 44.1.

### 2.5. 4-((allyloxy)methyl)-1,3-dioxolan-2-one(**2d**)

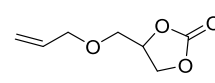 <sup>1</sup>H NMR (400 MHz, CDCl<sub>3</sub>) δ 5.88 (td, *J* = 10.9, 5.2 Hz, 1H), 5.26 (dd, *J* = 25.8, 13.8 Hz, 2H), 4.85 (dtd, *J* = 9.2, 4.9, 4.4, 2.4 Hz, 1H), 4.52 (td, *J* = 8.4, 1.4 Hz, 1H), 4.42 (dd, *J* = 8.3, 6.2 Hz, 1H), 4.06 (d, *J* = 5.6 Hz, 2H), 3.76 – 3.67 (m, 1H), 3.62 (dd, *J* = 11.1, 3.7 Hz, 1H). <sup>13</sup>C NMR (101 MHz, CDCl<sub>3</sub>) δ 155.1, 133.7, 118.0, 117.9, 75.1, 72.6, 68.8, 66.3.

### 2.6. 4-((allyloxy)methyl)-1,3-dioxolan-2-one(**2e**)

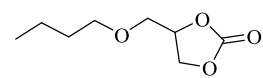 <sup>1</sup>H NMR (400 MHz, CDCl<sub>3</sub>) δ 4.91 – 4.77 (m, 1H), 4.51 (td, *J* = 8.4, 1.3 Hz, 1H), 4.41 (ddd, *J* = 8.1, 6.2, 1.3 Hz, 1H), 3.71 – 3.65 (m, 1H), 3.64 – 3.58 (m, 1H), 3.51 (t, *J* = 6.5 Hz, 2H), 1.61 – 1.51 (m, 2H), 1.36 (h, *J*

---

= 7.3 Hz, 2H), 0.92 (dd,  $J$  = 8.0, 6.8 Hz, 3H).  $^{13}\text{C}$  NMR (101 MHz,  $\text{CDCl}_3$ )  $\delta$  75.1, 71.9, 69.6, 66.3, 31.5, 19.2, 13.9.

2.7. tetrahydro-4H-cyclopenta[d][1,3]dioxol-2-one(**2f**)

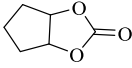  $^1\text{H}$  NMR (400 MHz,  $\text{CDCl}_3$ )  $\delta$  5.13 (d,  $J$  = 3.9 Hz, 1H), 2.24 – 1.23 (m, 6H).  $^{13}\text{C}$  NMR (101 MHz,  $\text{CDCl}_3$ )  $\delta$  155.6, 155.5, 81.9, 75.8, 33.2, 21.6, 19.2.

2.8. hexahydrobenzo[d][1,3]dioxol-2-one(**2g**)

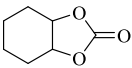  $^1\text{H}$  NMR (400 MHz,  $\text{CDCl}_3$ )  $\delta$  4.71 (q,  $J$  = 5.8, 5.0 Hz, 2H), 1.91 (dq,  $J$  = 9.4, 4.9 Hz, 4H), 1.62 (dd,  $J$  = 10.9, 5.6 Hz, 2H), 1.45 (dt,  $J$  = 11.5, 6.4 Hz, 2H).  $^{13}\text{C}$  NMR (101 MHz,  $\text{CDCl}_3$ )  $\delta$  155.5, 75.9, 26.8, 19.2.

### 3. NMR spectra of biomass-based ionic liquids and the products

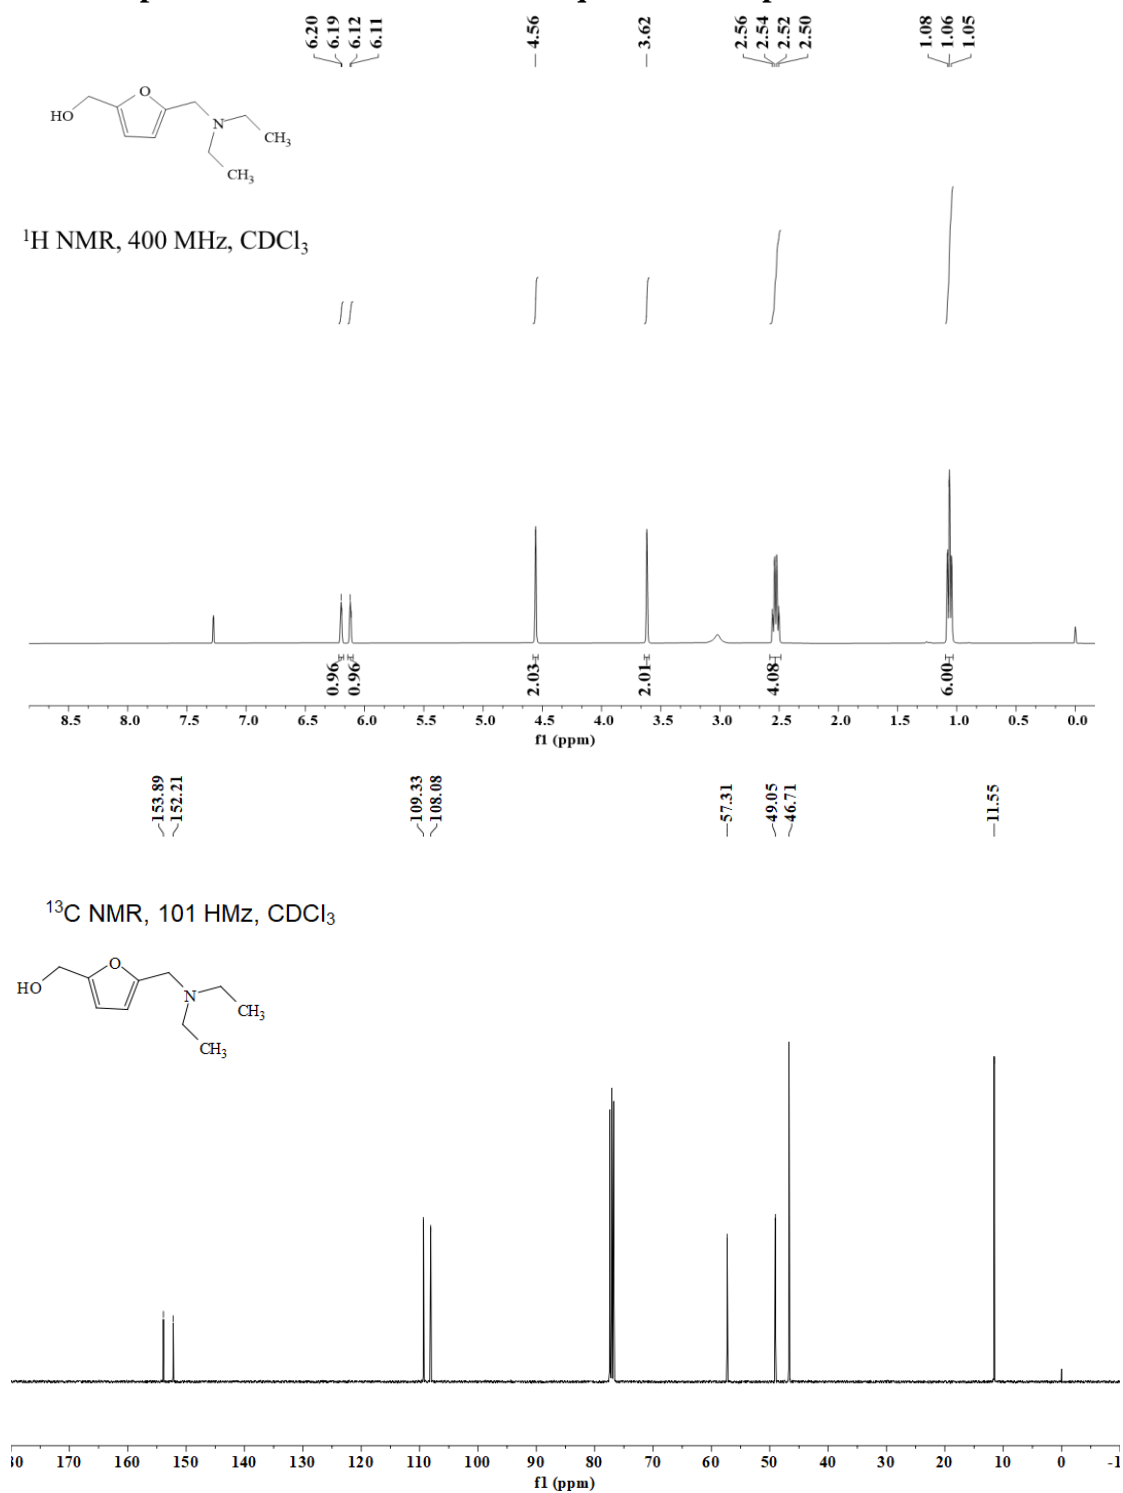

**Fig. S1**  $^1\text{H}$  (top) and  $^{13}\text{C}$  (bottom) NMR spectra of 5-((diethylamino)methyl)furan-2-yl)methanol (5-HMFD-NEt<sub>2</sub>).

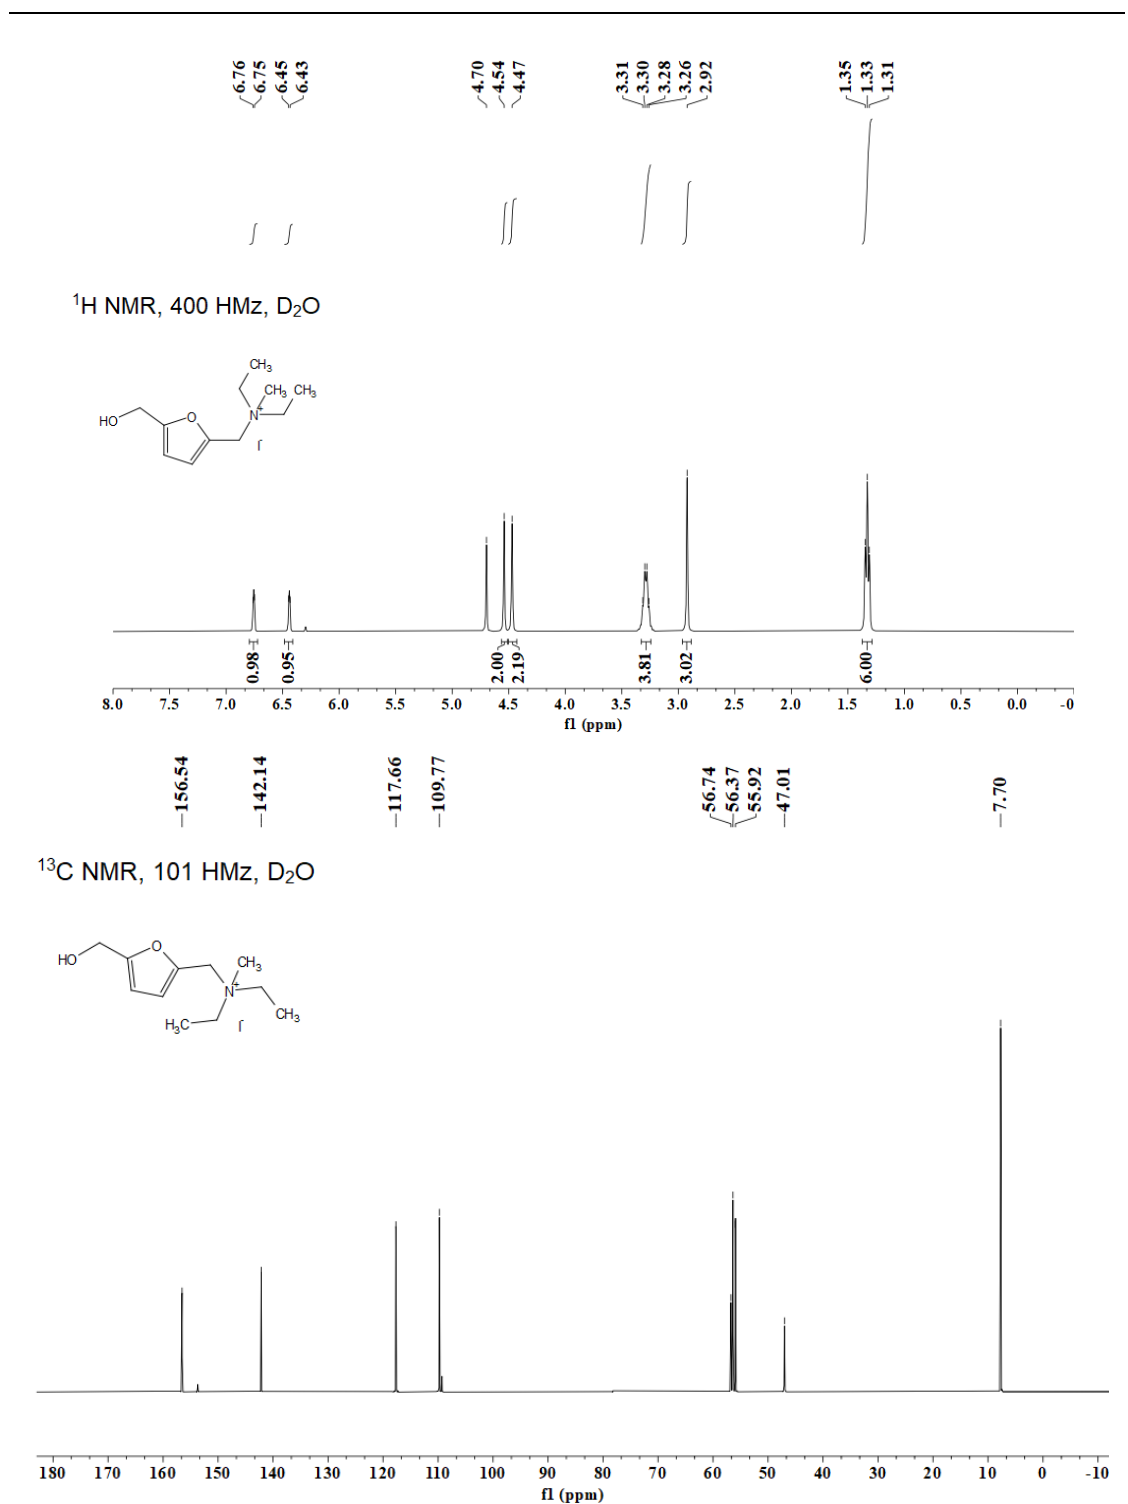

**Fig. S2** <sup>1</sup>H (top) and <sup>13</sup>C (bottom) NMR spectra of *N*-ethyl-*N*-((5-(hydroxymethyl)furan-2-yl)methyl)-*N*-methylethanaminium iodide ([5-HMFD-NMeEt<sub>2</sub>]<sup>+</sup>I<sup>-</sup>).

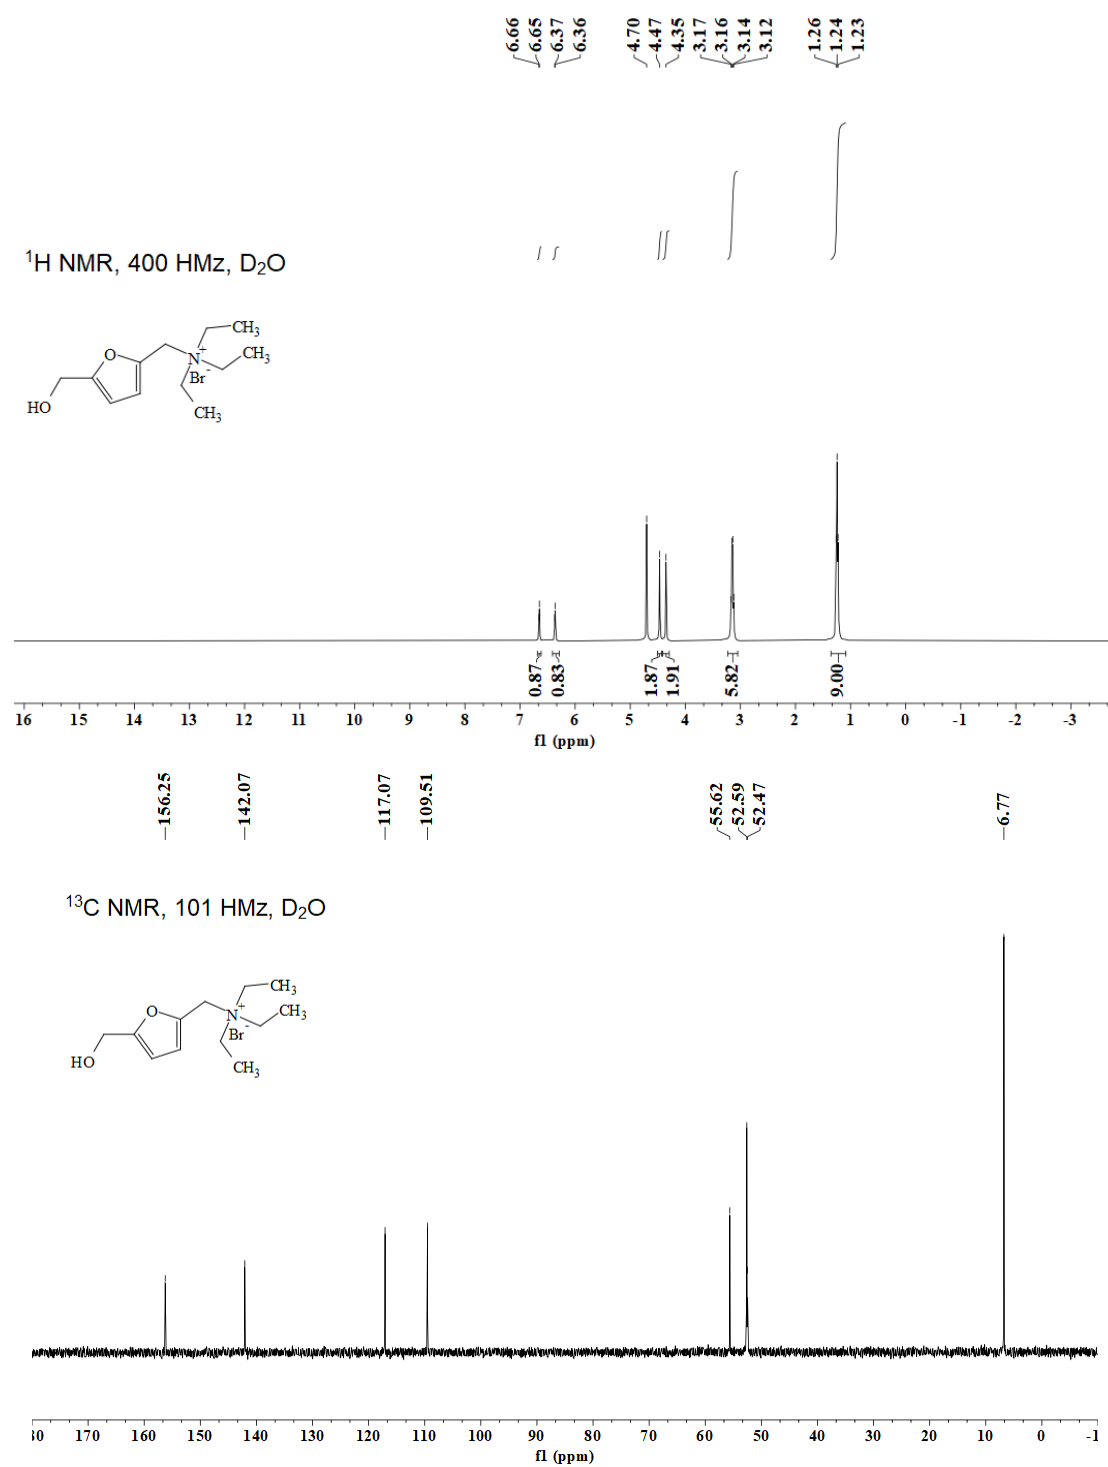

**Fig. S3** <sup>1</sup>H (top) and <sup>13</sup>C (bottom) NMR spectra of *N,N*-diethyl-*N*-((5-(hydroxymethyl)furan-2-yl)methyl)ethanaminium bromide ([5-HMFD-NEt<sub>3</sub>]Br).

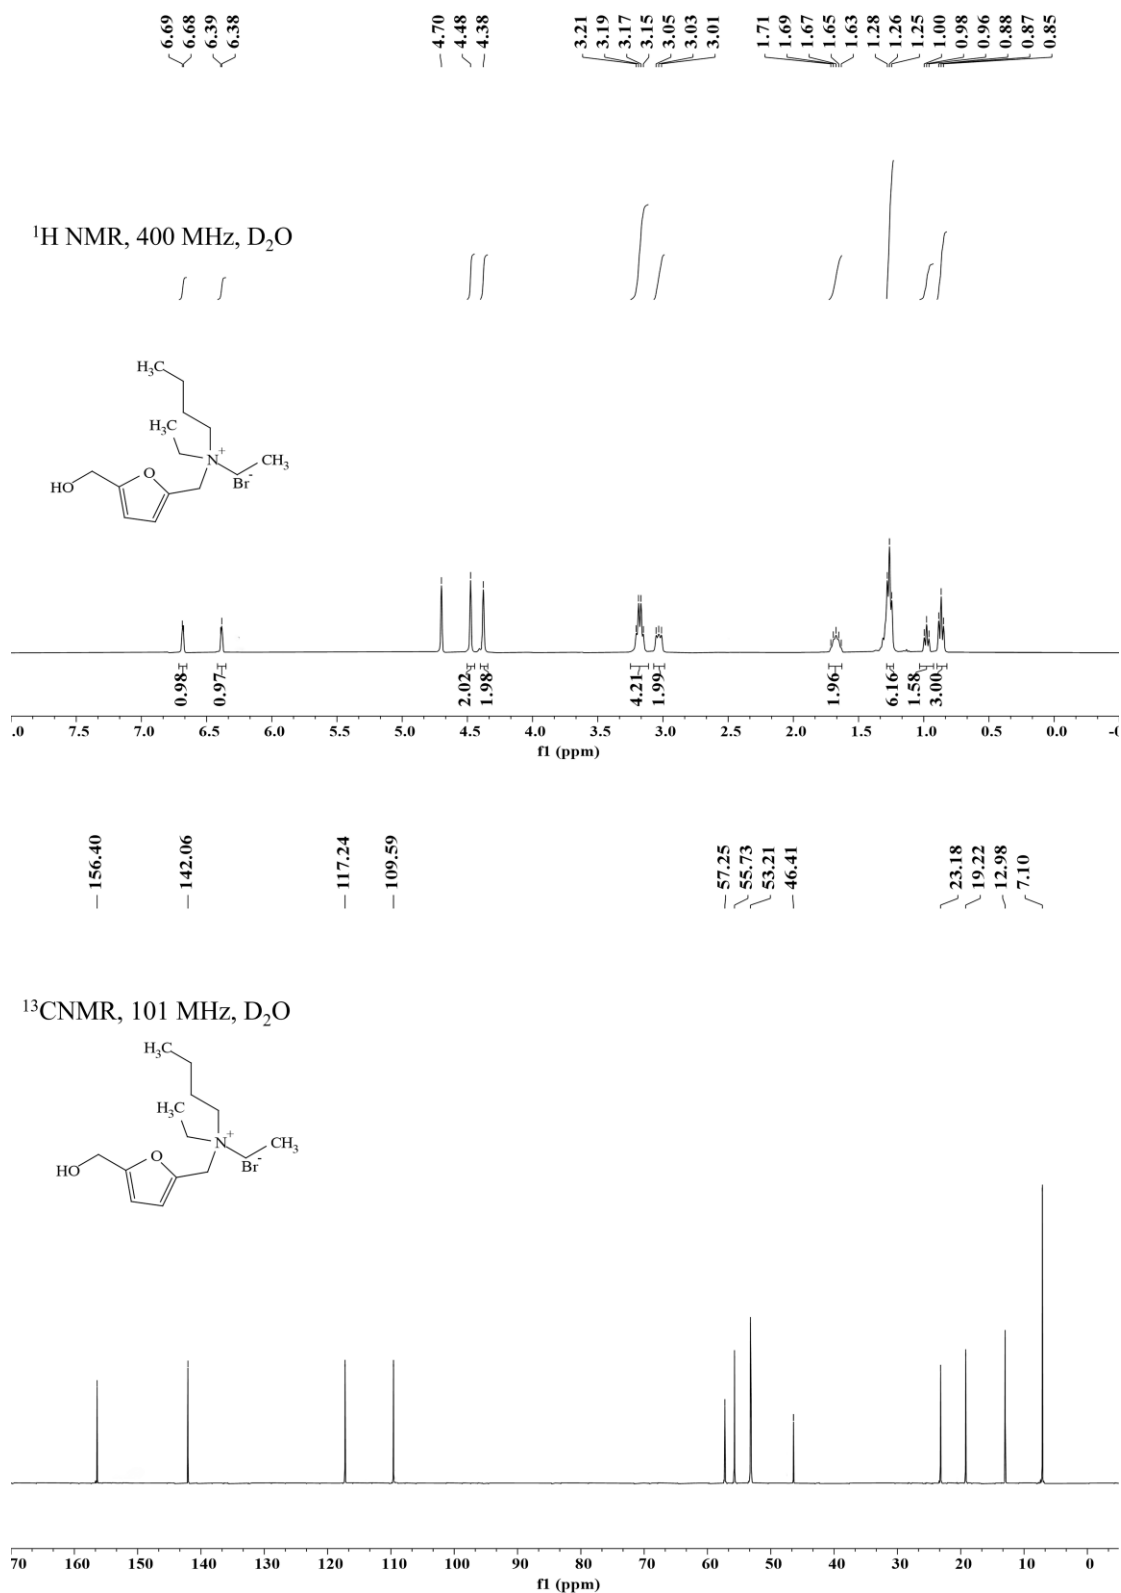

**Fig. S4** <sup>1</sup>H (top) and <sup>13</sup>C (bottom) NMR spectra of *N,N*-diethyl-*N*-((5-(hydroxymethyl)furan-2-yl)methyl)butan-1-aminium bromide ([5-HMFD-NBuEt<sub>2</sub>]Br).

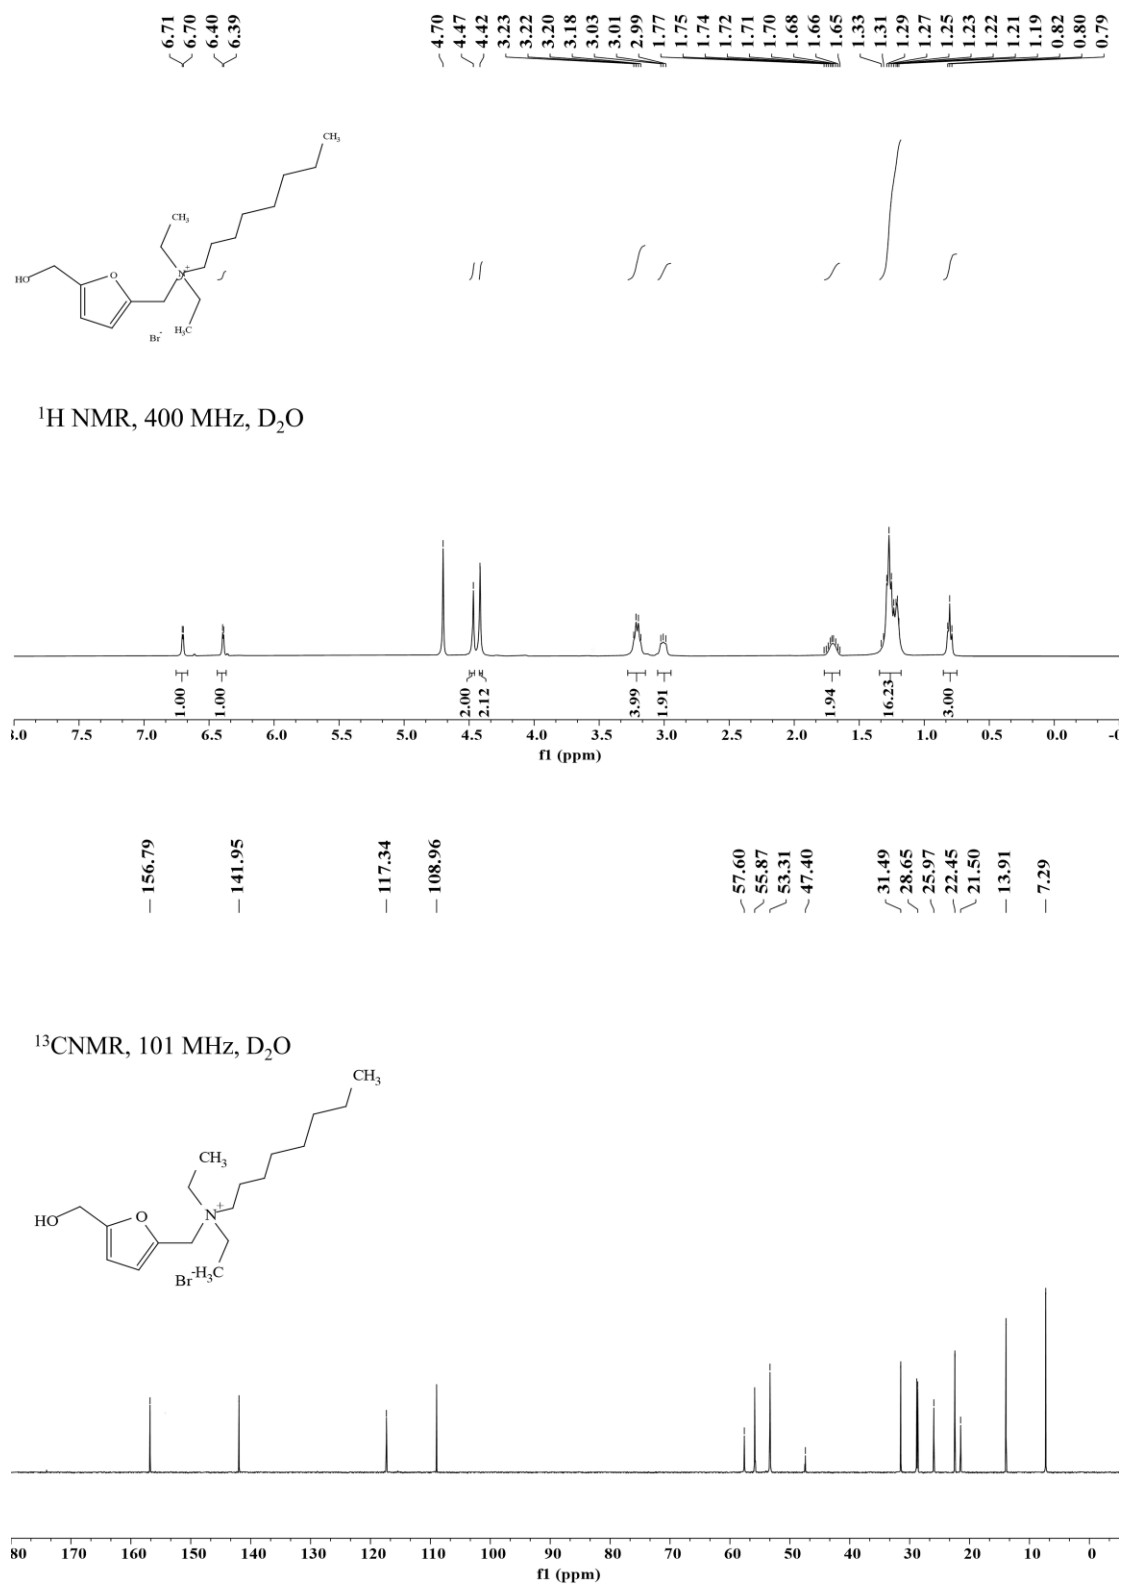

**Fig. S5** <sup>1</sup>H (top) and <sup>13</sup>C (bottom) NMR spectra of *N,N*-diethyl-*N*-((5-(hydroxymethyl)furan-2-yl)methyl)octan-1-aminium bromide ([5-HMFD-NHEt<sub>2</sub>]<sup>+</sup>Br<sup>-</sup>).

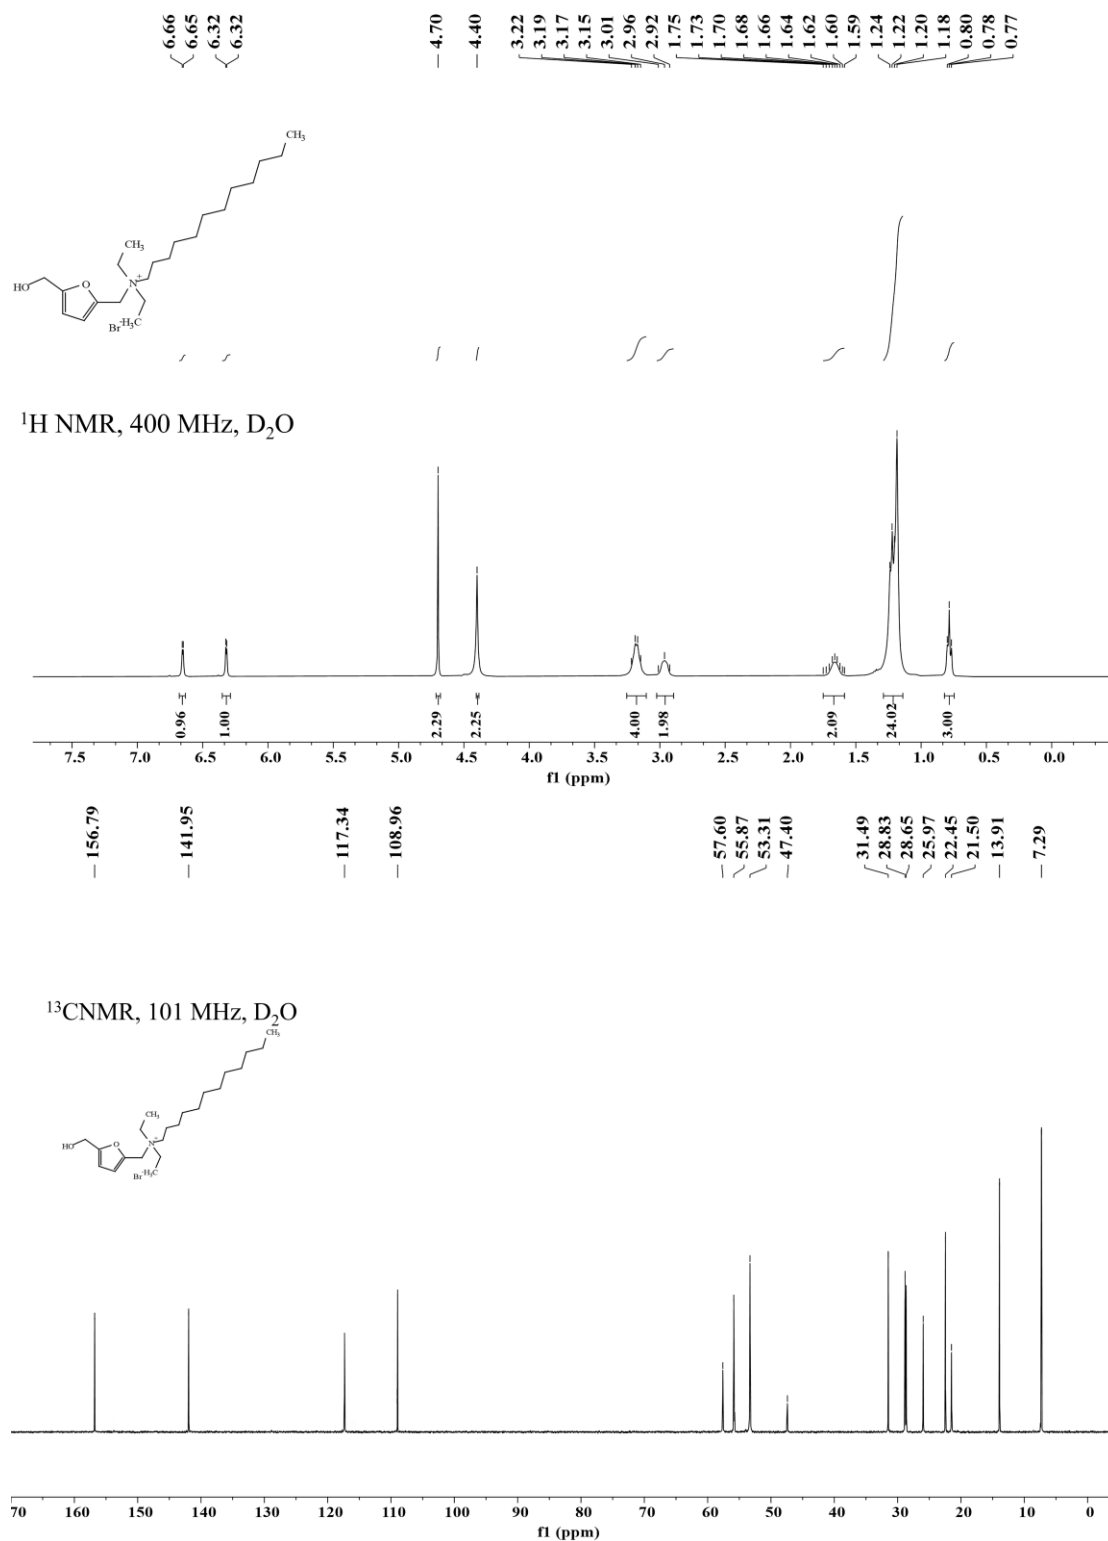

**Fig. S6** <sup>1</sup>H (top) and <sup>13</sup>C (bottom) NMR spectra of *N,N*-diethyl-*N*-((5-(hydroxymethyl)furan-2-yl)methyl)dodecan-1-aminium bromide ([5-HMFD-NDoEt<sub>2</sub>]<sup>+</sup>Br<sup>-</sup>).

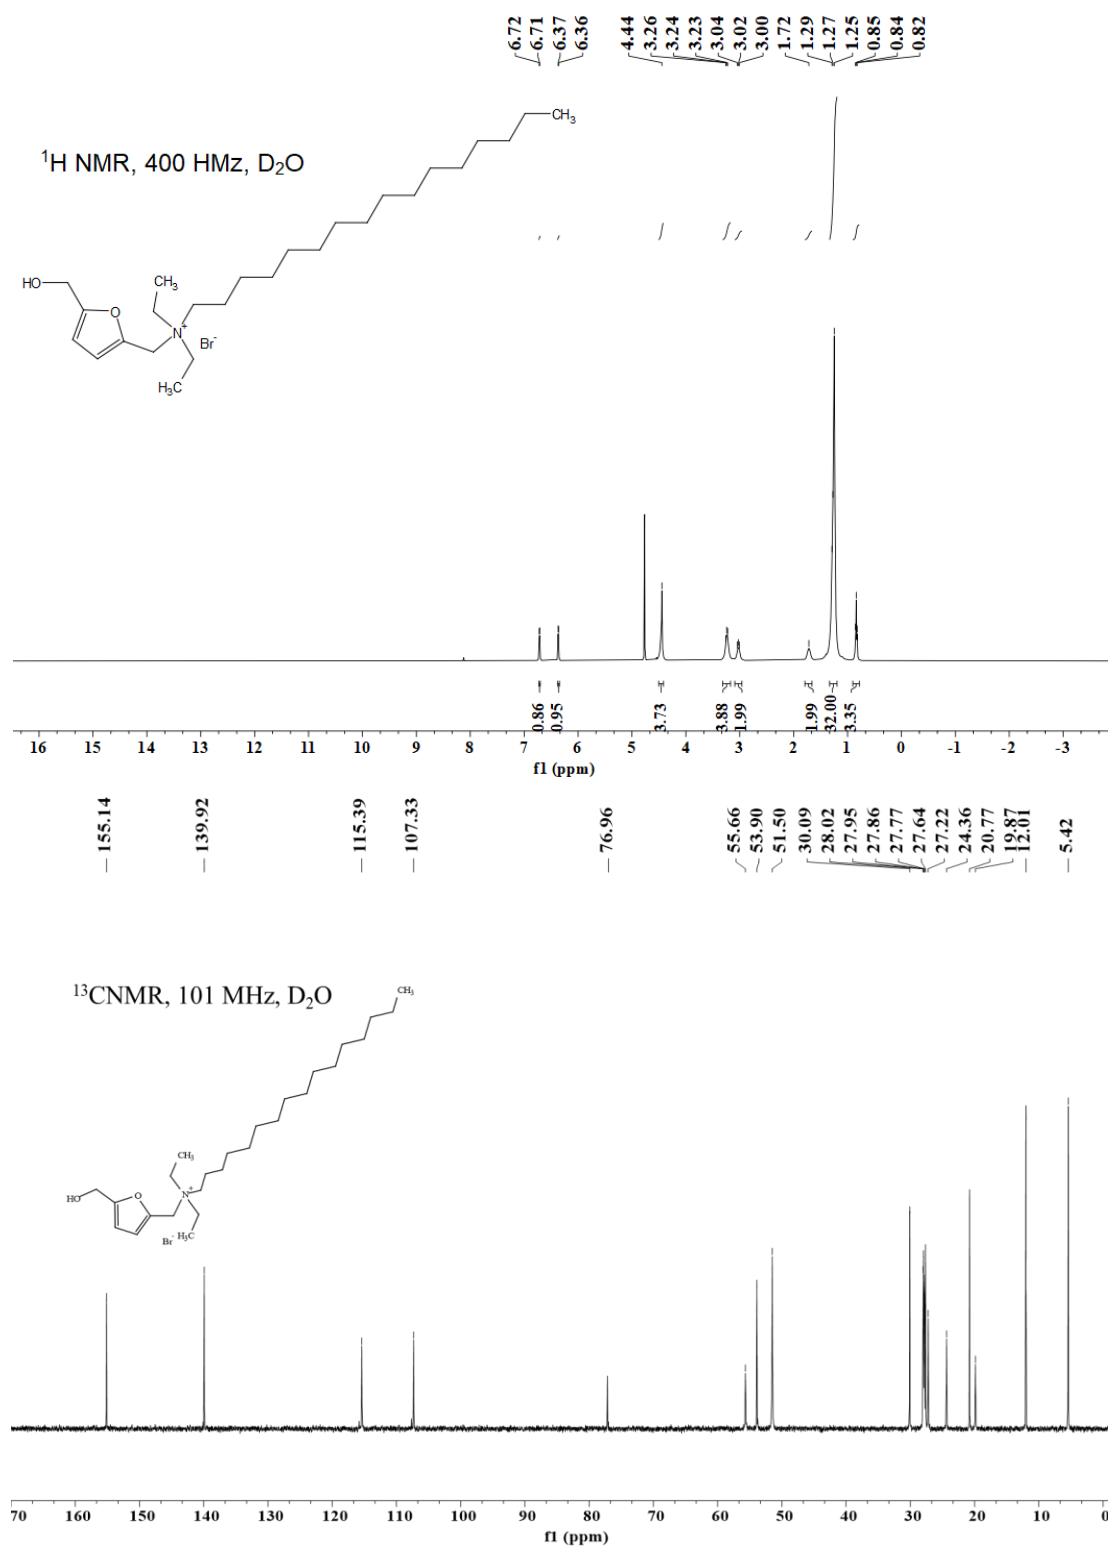

**Fig. S7** <sup>1</sup>H (top) and <sup>13</sup>C (bottom) NMR spectra of *N,N*-diethyl-*N*-((5-(hydroxymethyl)furan-2-yl)methyl)hexadecan-1-aminium bromide ([5-HMFD-N<sup>+</sup>CeEt<sub>2</sub>]Br).

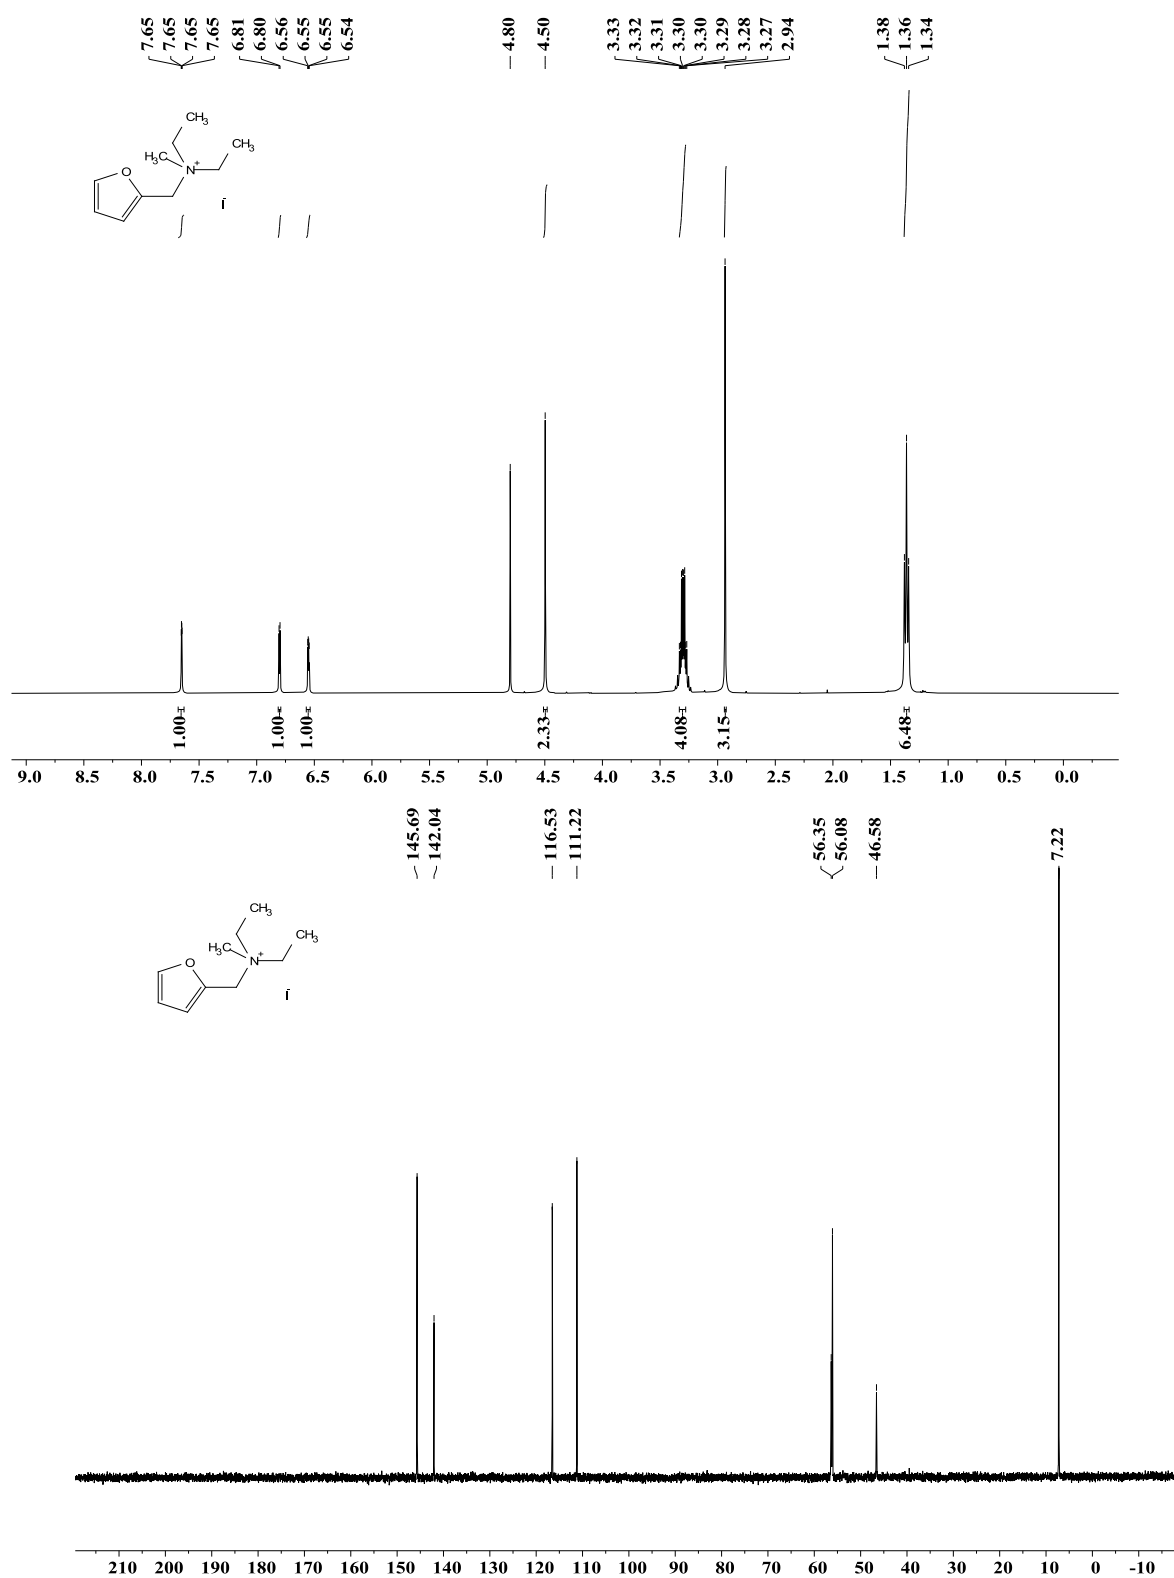

**Fig. S8** <sup>1</sup>H (top) and <sup>13</sup>C (bottom) NMR spectra of *N*-ethyl-*N*-(furan-2-ylmethyl)-*N*-methylethanaminium iodide ([2-FD-NMeEt<sub>2</sub>]I).

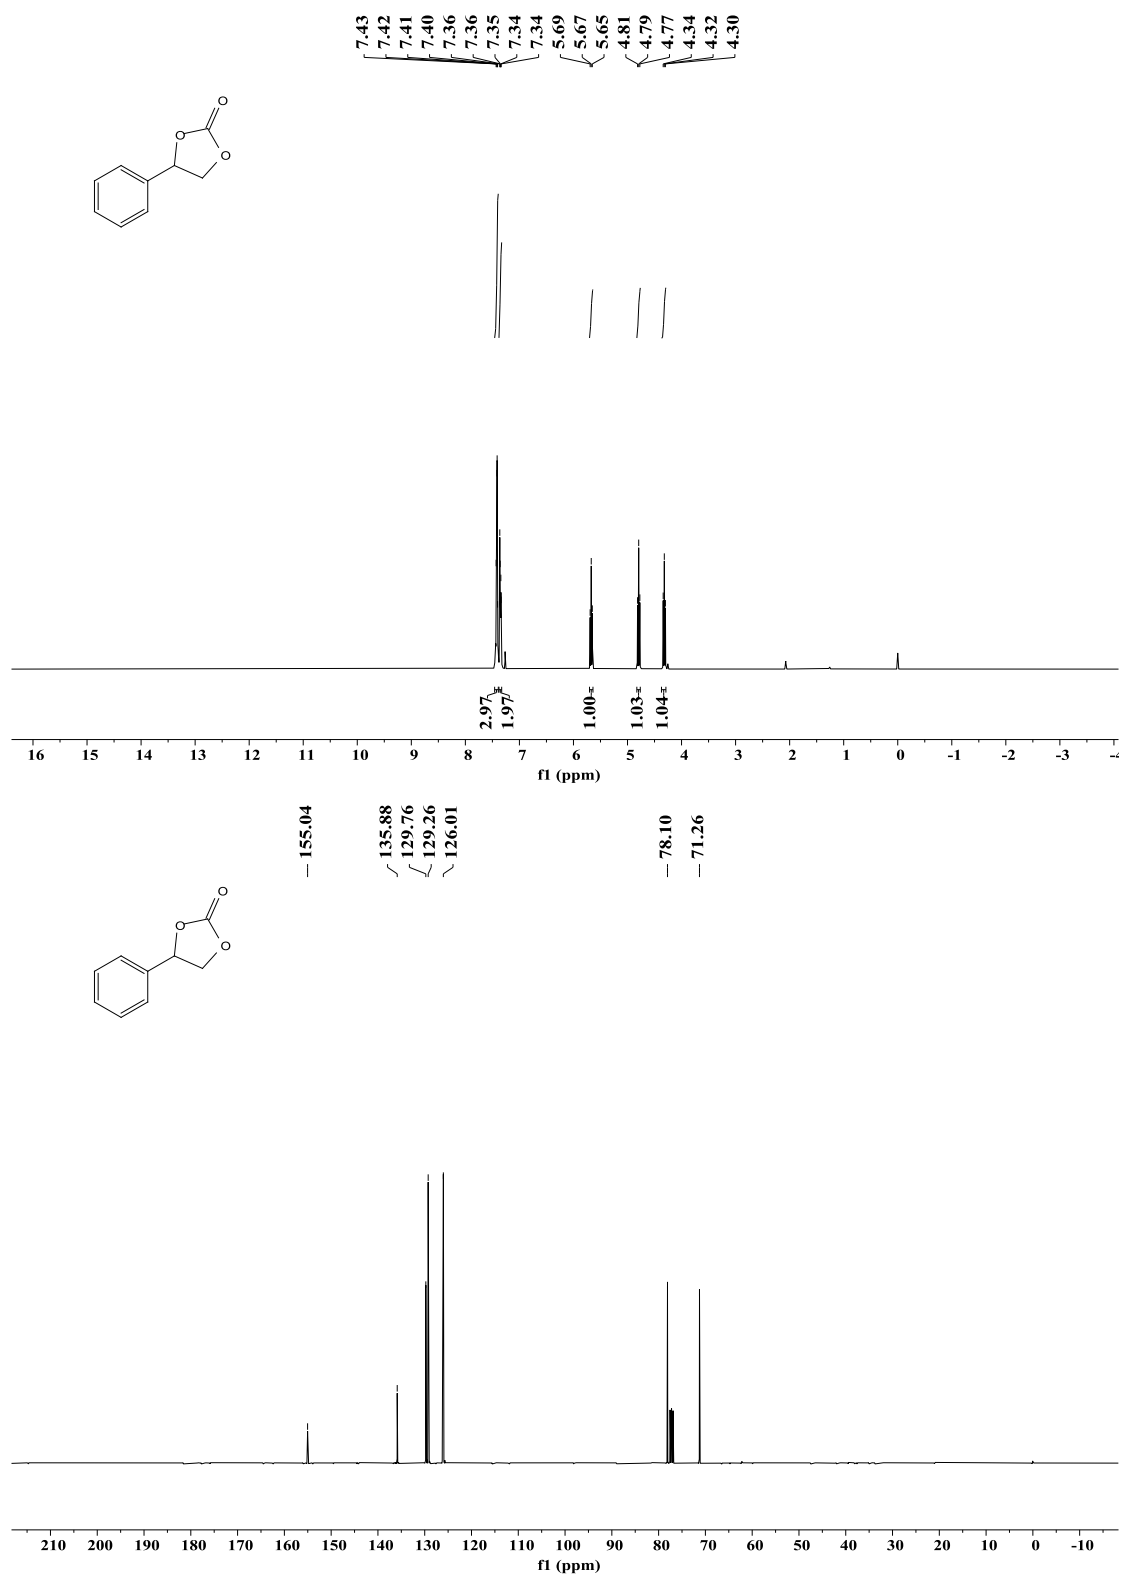

**Fig. S9** <sup>1</sup>H (top) and <sup>13</sup>C (bottom) NMR spectra of 4-phenyl-1,3-dioxolan-2-one (**2a**).

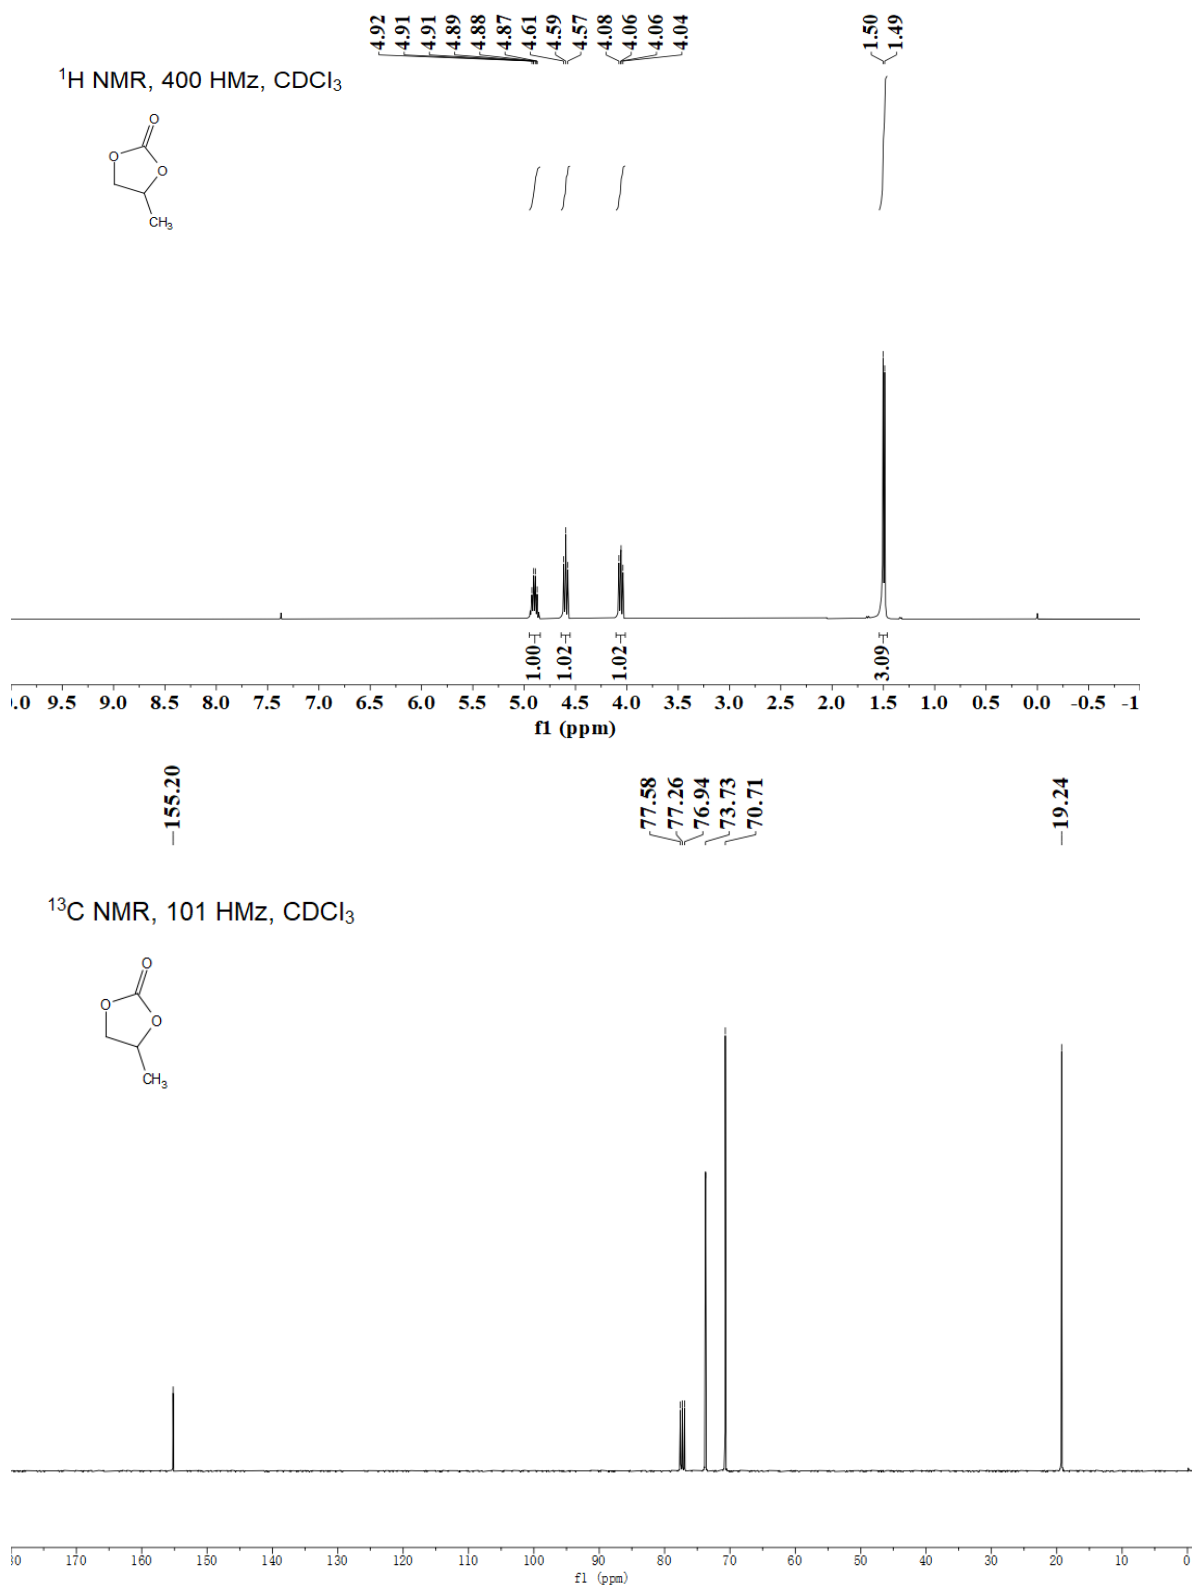

**Fig. S10** <sup>1</sup>H (top) and <sup>13</sup>C (bottom) NMR spectra of 4-methyl-1,3-dioxolan-2-one (**2b**).

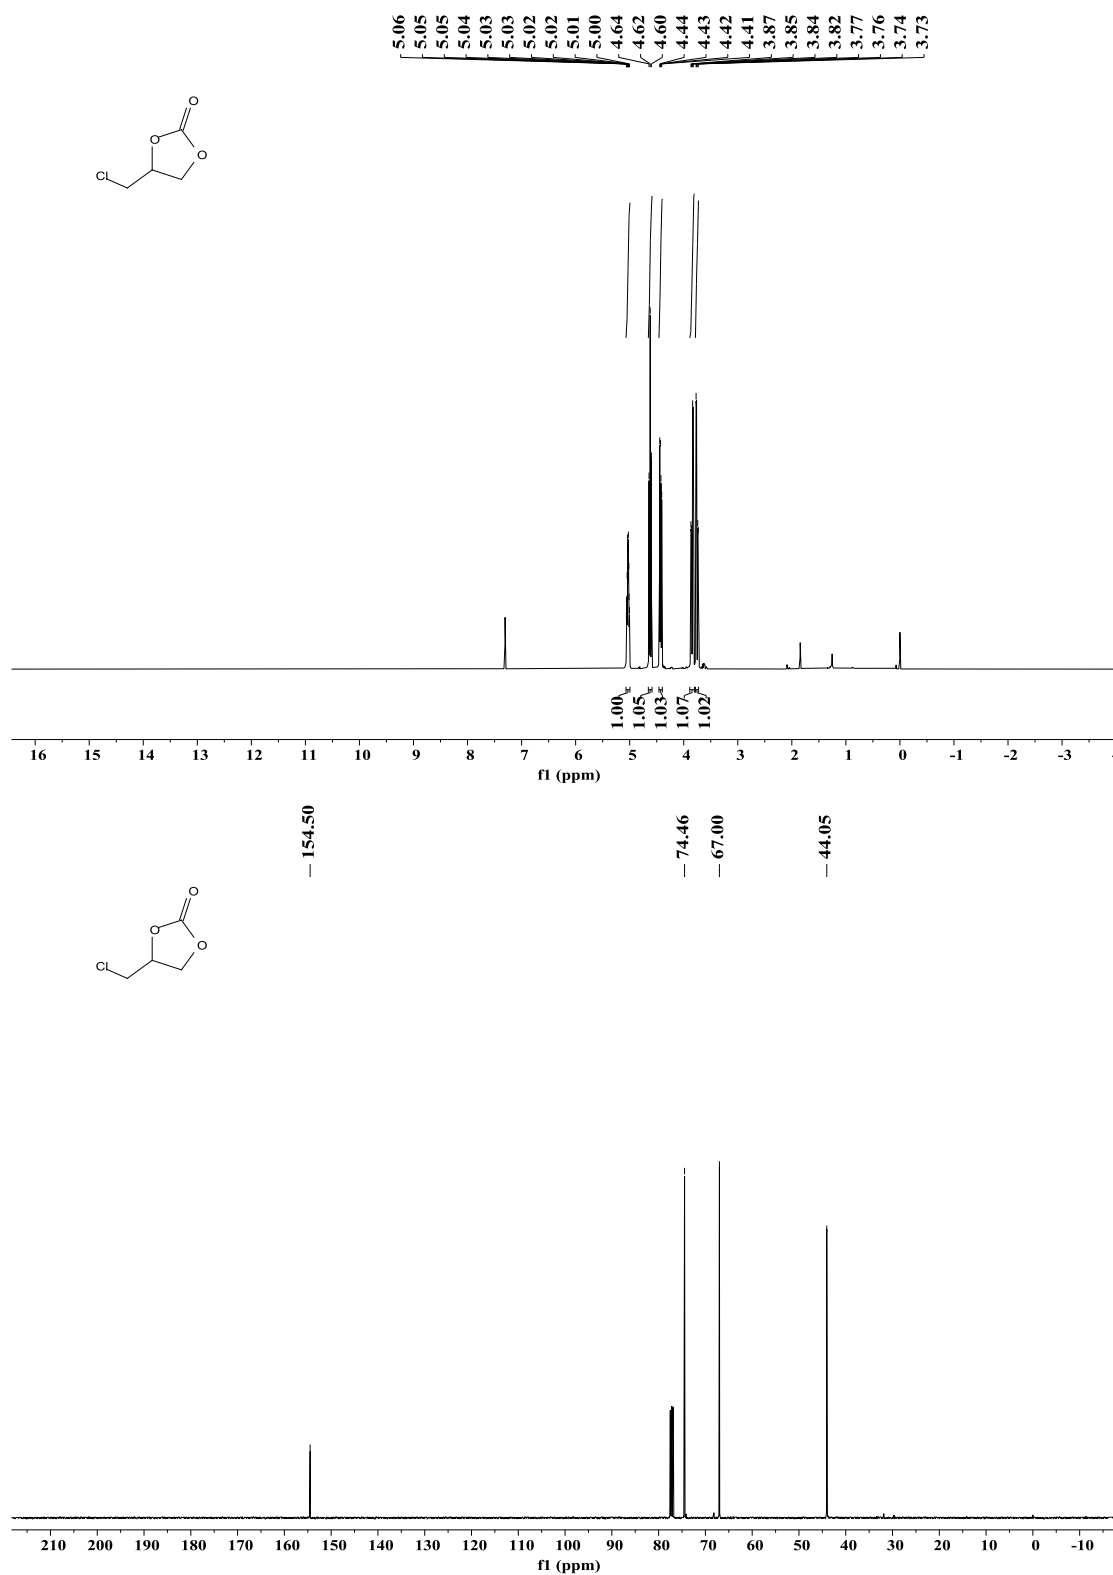

**Fig. S11** <sup>1</sup>H (top) and <sup>13</sup>C (bottom) NMR spectra of 4-(chloromethyl)-1,3-dioxolan-2-one (**2c**).

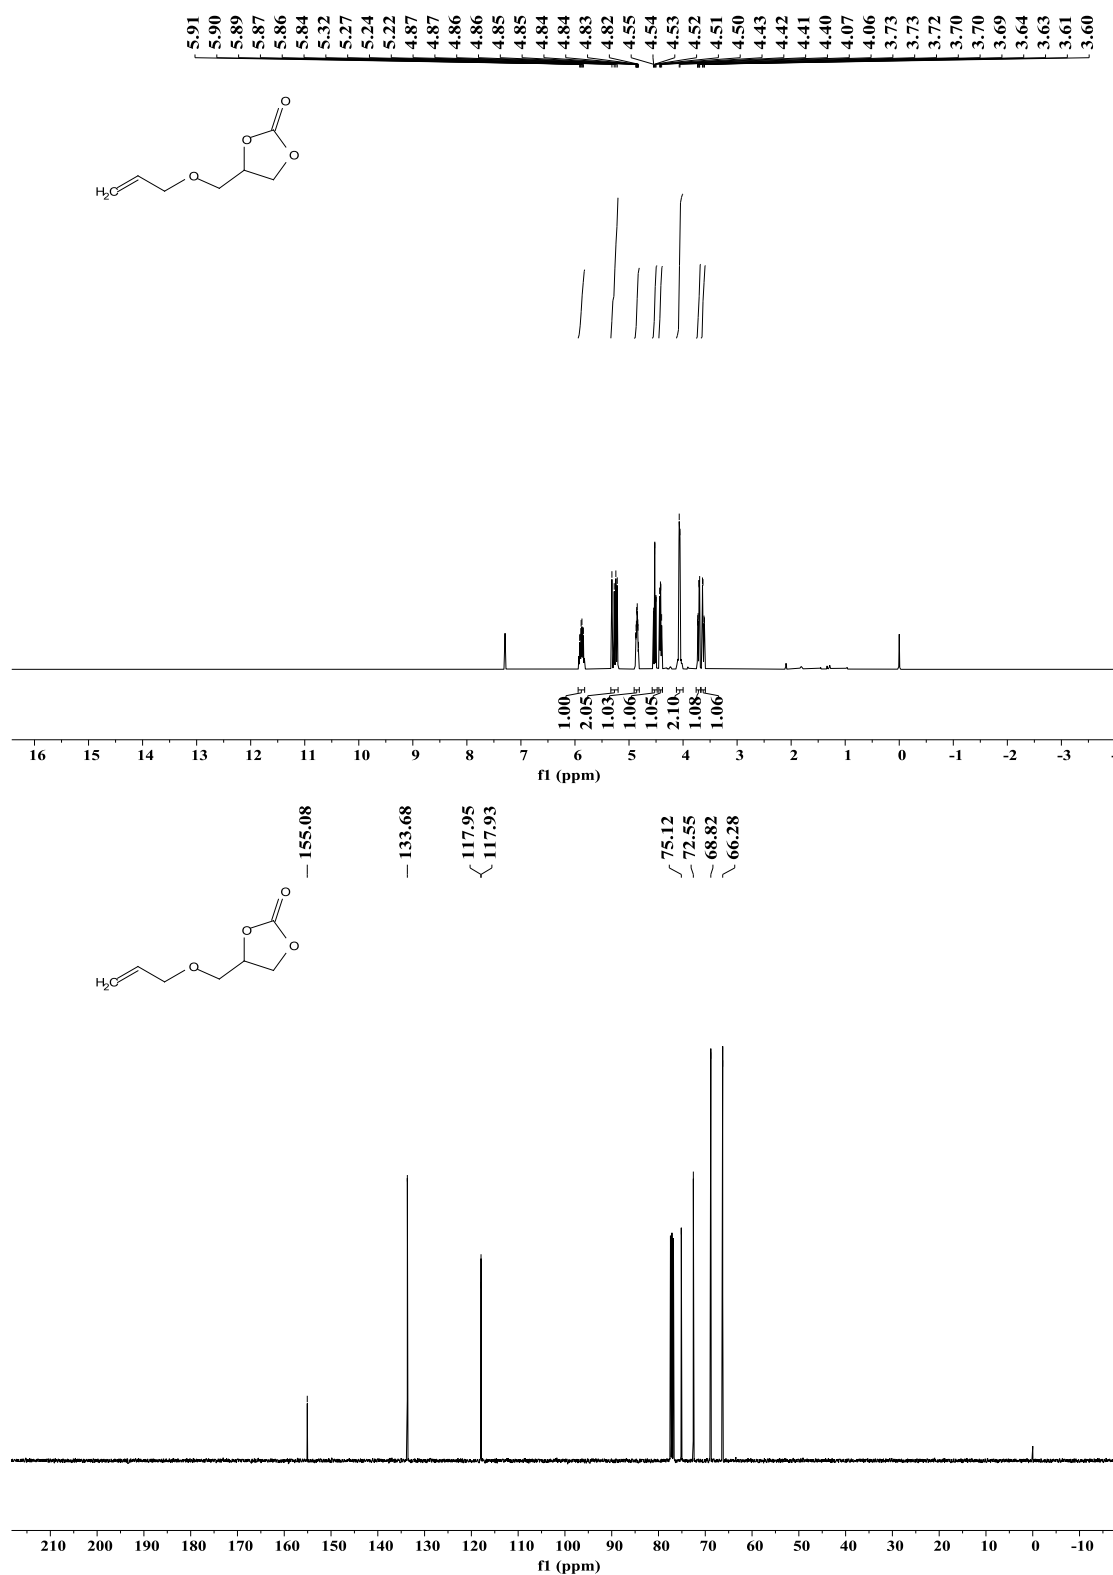

**Fig. S12** <sup>1</sup>H (top) and <sup>13</sup>C (bottom) NMR spectra of 4-((allyloxy)methyl)-1,3-dioxolan-2-one (**2d**).

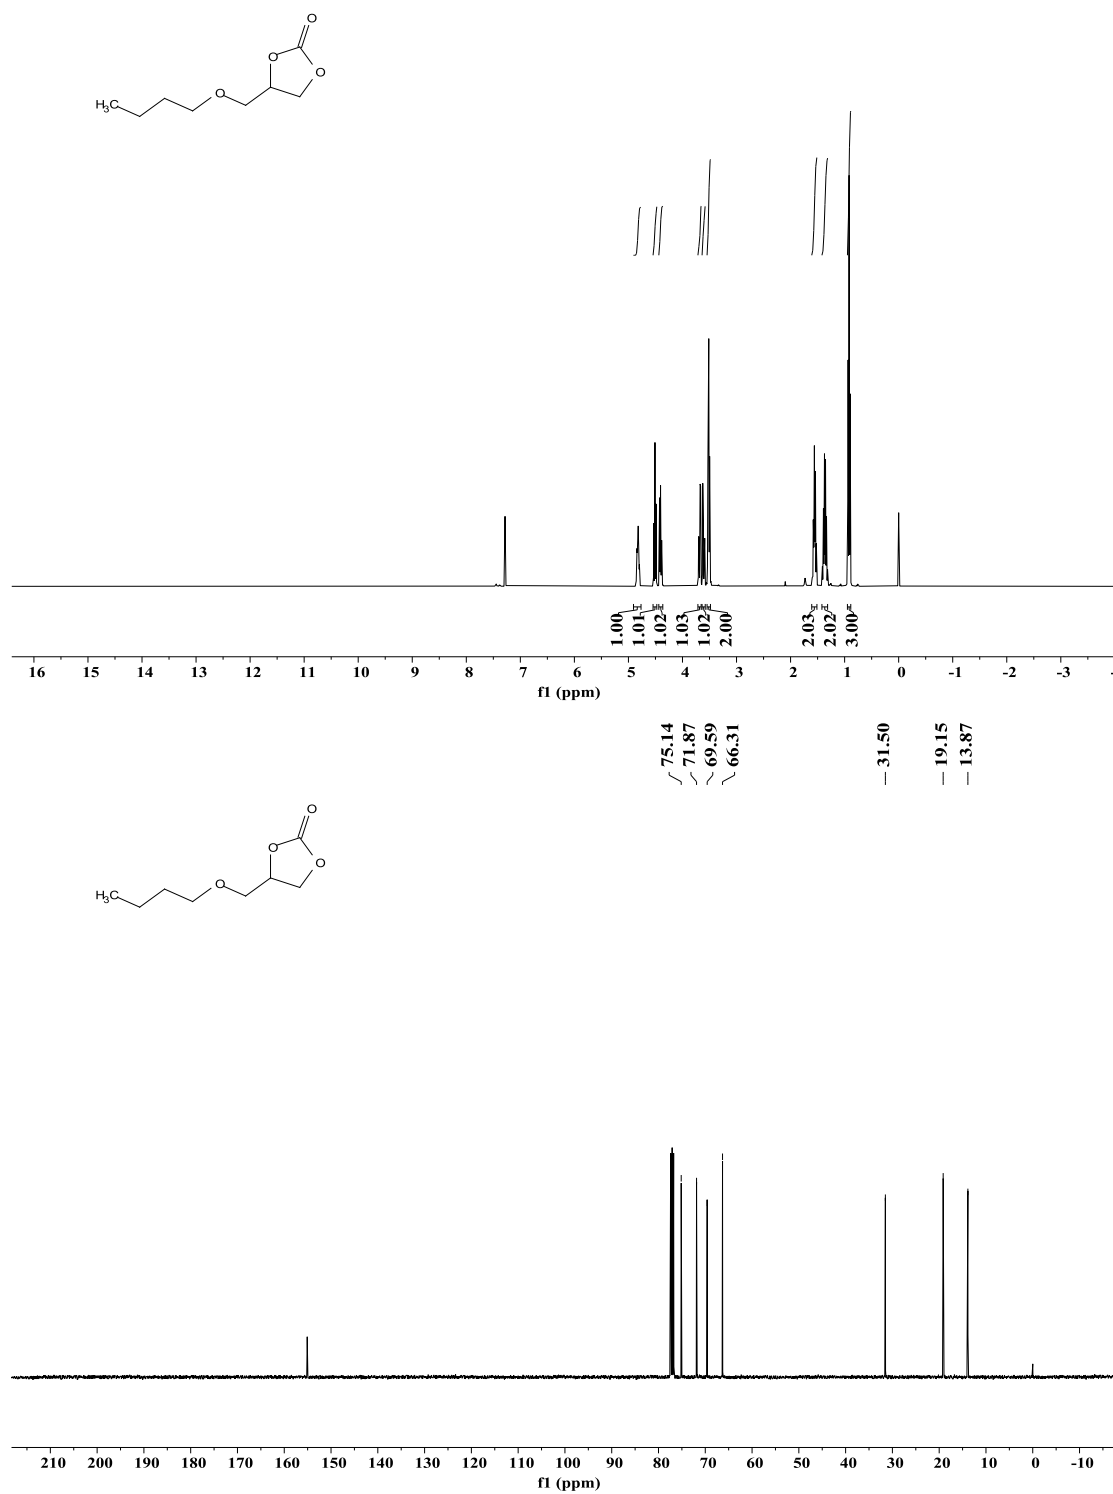

**Fig. S13** <sup>1</sup>H (top) and <sup>13</sup>C (bottom) NMR spectra of 4-(butoxymethyl)-1,3-dioxolan-2-one (**2e**).

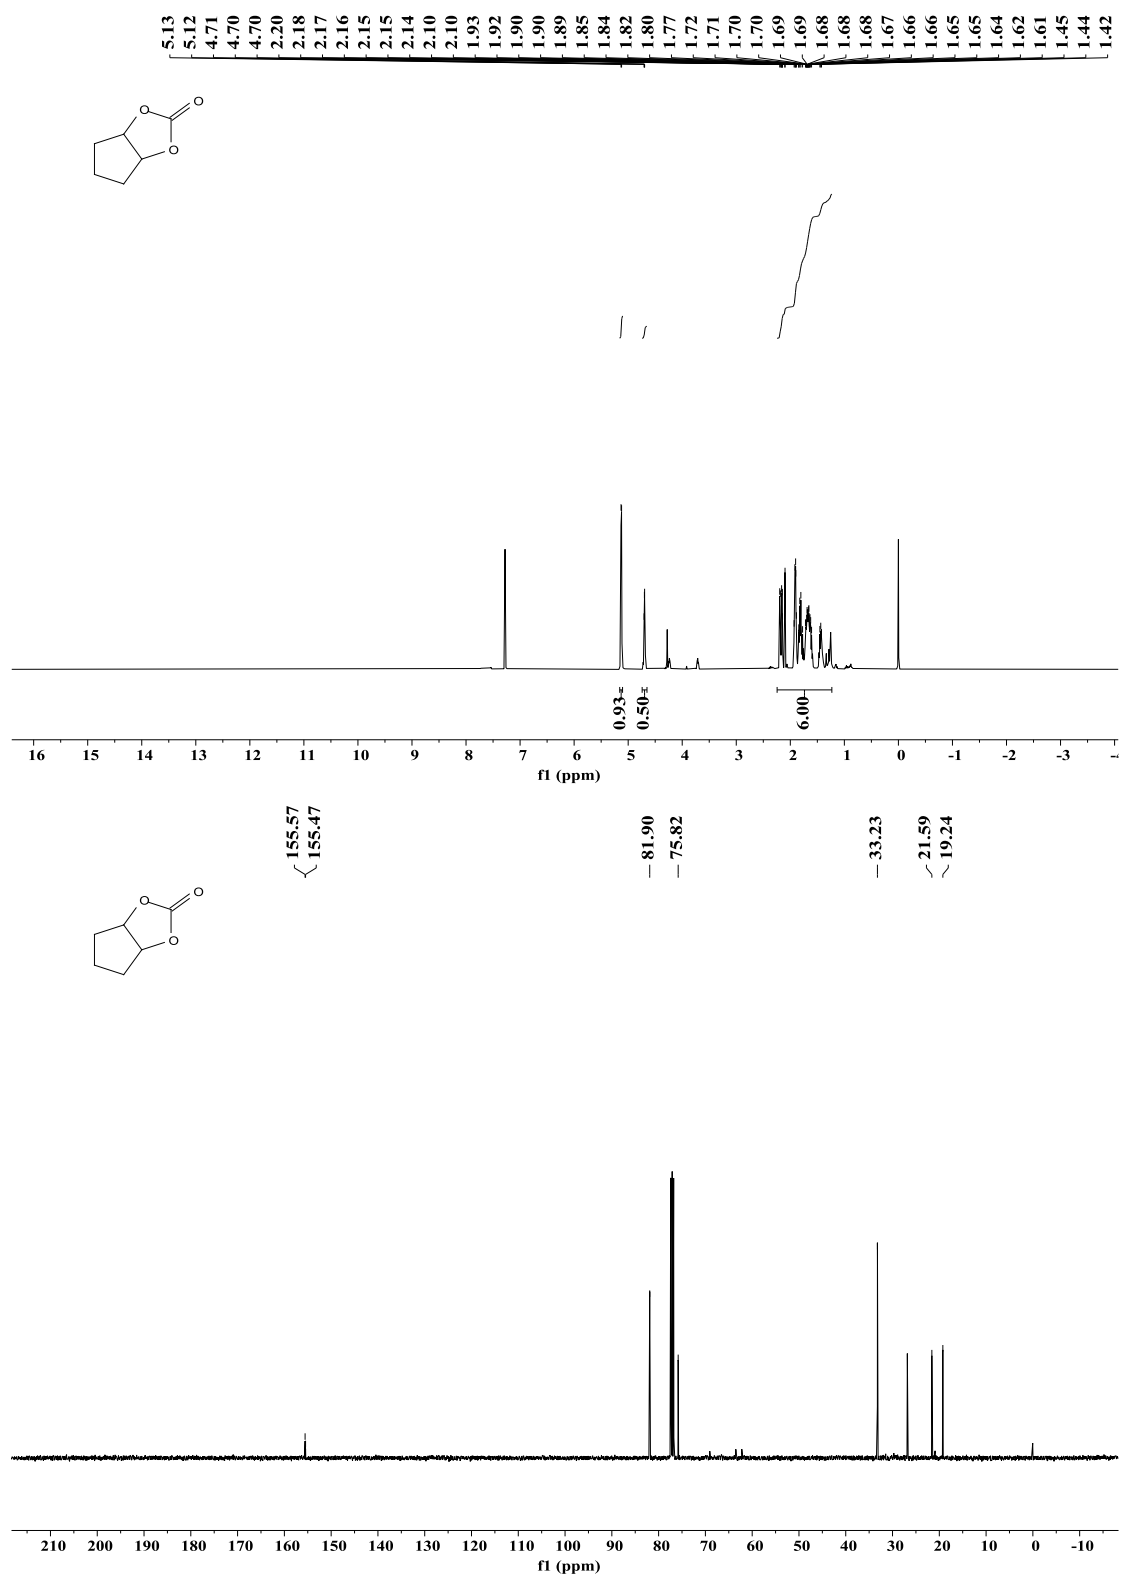

**Fig. S14** <sup>1</sup>H (top) and <sup>13</sup>C (bottom) NMR spectra of tetrahydro-4H-cyclopenta[d][1,3]dioxol-2-one (2f).

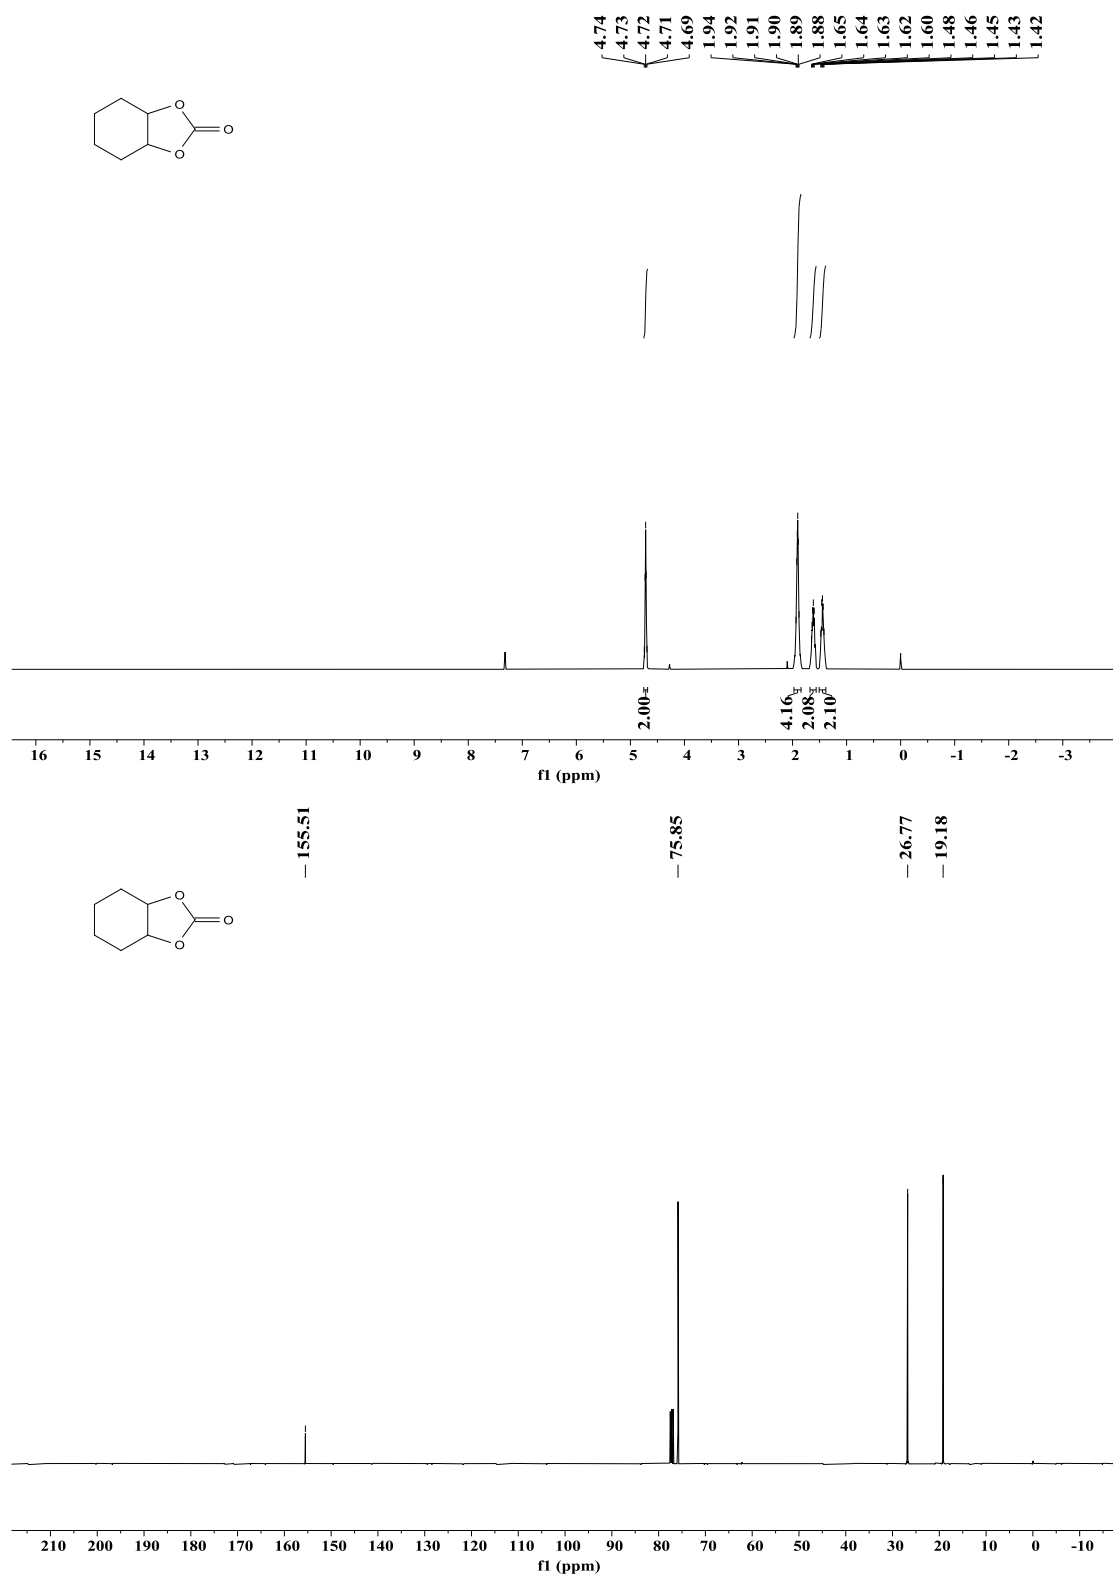

**Fig. S15** <sup>1</sup>H (top) and <sup>13</sup>C (bottom) NMR spectra of hexahydrobenzo[d][1,3]dioxol-2-one (**2g**).

#### 4. IR spectra to test the hydrogen bonding effect and confirm the configuration of 2f and 2g

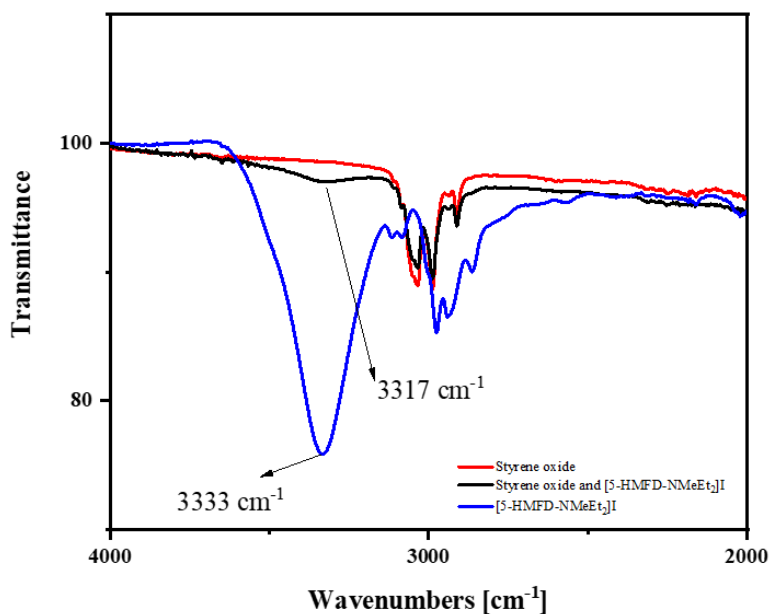

**Fig. S16** IR spectra of [5-HMFD-NMeEt<sub>2</sub>]I, styrene oxide, and the mixture of [5-HMFD-NMeEt<sub>2</sub>]I and styrene oxide.

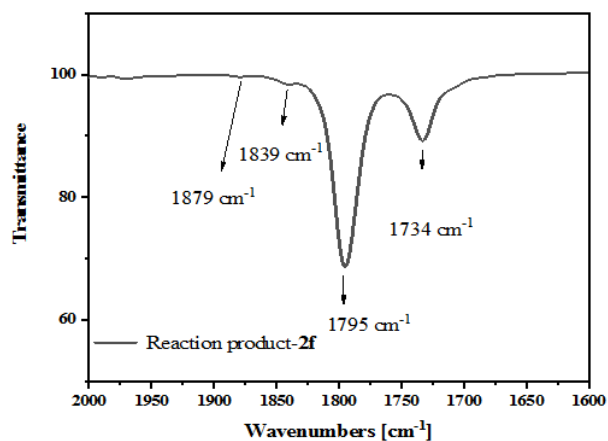

**Fig. S17** IR spectrum of 2f.

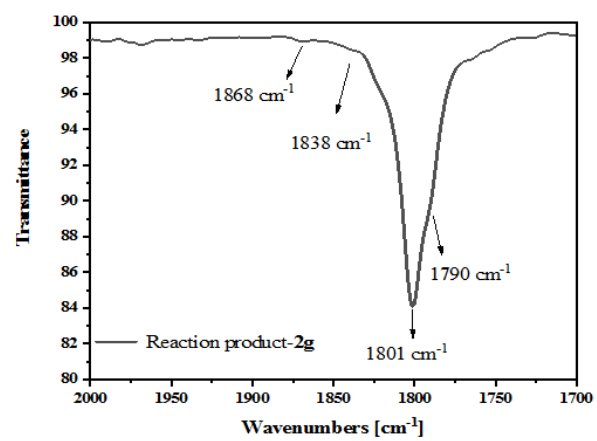

**Fig. S18** IR spectrum of **2g**.
